# Supplementary material
Source: MDPI journal article supplement (https://www.mdpi.com/1424-8247/16/8/1144)
Supplement: s1 [file s1]

Supplementary Materials

Table S1. Chemical composition of CDR paste.

| Herb              | Chemical marker               | Content (mg/g) of paste |
|-------------------|-------------------------------|-------------------------|
| Carthami Flos (C) | Hydroxysafflor yellow A (HYA) | 2.14                    |
|                   | Kaempferol (KAE)              | 0.004                   |
| Dipsaci Radix (D) | Asperosaponin VI (ASP)        | 19.23                   |
|                   | Oleanolic acid (OA)           | 0.05                    |
| Rhei Rhizoma (R)  | Emodin (EMO)                  | 0.96                    |
|                   | Rhein (RHE)                   | 1.00                    |

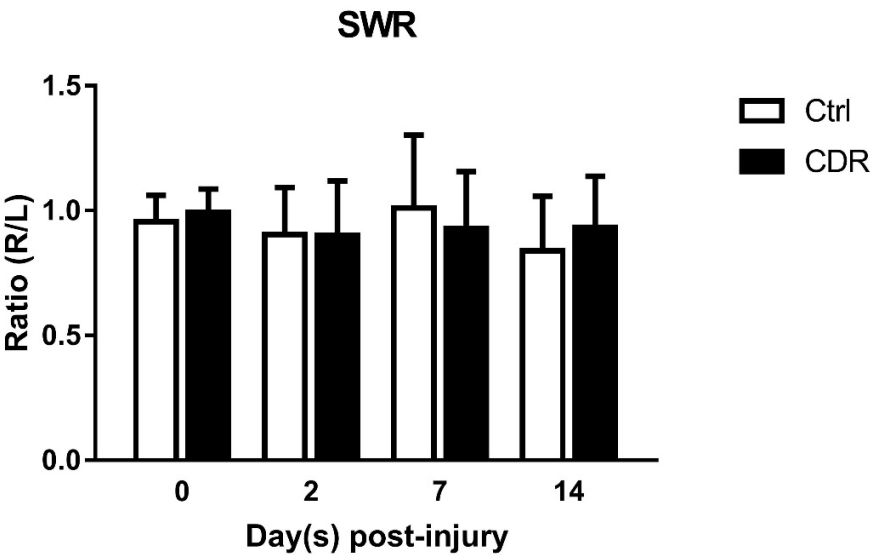

**Figure S1.** The static weight ratio (SWR) of the rats throughout the experiment. R and L mean the right (contused) leg and left (normal leg without contusion) leg, respectively. Data ~~is~~are presented as mean and the error bars indicate the standard deviation.
